# Supplementary material for: Absence of MERS-CoV antibodies in feral camels in Australia: Implications for the pathogen's origin and spread
Source: PubMed Central journal article supplement — One Health. 2015 Nov 2;1:76–82. doi: 10.1016/j.onehlt.2015.10.003 (PMC5441328; doi:10.1016/j.onehlt.2015.10.003), 2015-11-02
Supplement: mmc1.pdf [file mmc1.pdf]

**Table S1.** Serology results for all camel sera tested. (ND: not done; Neg: no neutralisation at a dilution of 1:10)

| Sample ID                      | Luminex reading (MFI) |        | VNT titre for MERS-CoV | Sex | Age (yrs) |
|--------------------------------|-----------------------|--------|------------------------|-----|-----------|
|                                | SARS N                | MERS N |                        |     |           |
| NSC                            | 79                    | 79     | ND                     |     |           |
| Normal Horse                   | 200                   | 593    | ND                     |     |           |
| SARS Horse                     | 29319                 | 5649   | ND                     |     |           |
| Hong Kong Neg Camel #1         | 147                   | 191    | Neg                    |     |           |
| Hong Kong Pos Camel #1         | 178                   | 8127   | 1:800                  |     |           |
| Hong Kong Neg Camel #12        |                       |        | Neg                    |     |           |
| Hong Kong Neg Camel #17        |                       |        | Neg                    |     |           |
| Saudi Arabia 2313016868        | ND                    | ND     | 1:400                  |     |           |
| Saudi Arabia 2313016870        | ND                    | ND     | 1:1600                 |     |           |
| Saudi Arabia 2313016872        | ND                    | ND     | 1:800                  |     |           |
| Saudi Arabia 2313016874        | ND                    | ND     | >1:6400                |     |           |
| Saudi Arabia 2313016876        | ND                    | ND     | 1:800                  |     |           |
| Saudi Arabia 2313016880        | ND                    | ND     | 1:3200                 |     |           |
| Saudi Arabia 2313016882        | ND                    | ND     | 1:800                  |     |           |
| Saudi Arabia 2313016884        | ND                    | ND     | >1:6400                |     |           |
| Saudi Arabia 2313016886        | ND                    | ND     | 1:800                  |     |           |
| Saudi Arabia 2313016888        | ND                    | ND     | 1:3200                 |     |           |
| Australian 13-03949-1 Dec 2013 | 153                   | 655    | Neg                    |     |           |
| 2                              | 112                   | 827    | Neg                    |     |           |
| 3                              | 131                   | 480    | Neg                    |     |           |
| 4                              | 95                    | 518    | Neg                    |     |           |
| 5                              | 148                   | 733    | Neg                    |     |           |
| 6                              | 102                   | 575    | Neg                    |     |           |
| 7                              | 144                   | 550    | Neg                    |     |           |
| 8                              | 131                   | 953    | Neg                    |     |           |
| 9                              | 117                   | 517    | Neg                    |     |           |
| 10                             | 128                   | 882    | Neg                    |     |           |
| 11                             | 112                   | 733    | Neg                    |     |           |
| 12                             | 119                   | 691    | Neg                    |     |           |
| 13                             | 114                   | 561    | Neg                    |     |           |
| 14                             | 109                   | 688    | Neg                    |     |           |
| 15                             | 171                   | 609    | Neg                    |     |           |
| 16                             | 140                   | 578    | Neg                    |     |           |
| 17                             | 129                   | 565    | Neg                    |     |           |
| 18                             | 123                   | 474    | Neg                    |     |           |
| 19                             | 114                   | 575    | Neg                    |     |           |
| 20                             | 1256                  | 509    | Neg                    |     |           |
| 21                             | 125                   | 170    | Neg                    |     |           |
| 22                             | 102                   | 147    | Neg                    |     |           |

|                                |     |      |     |  |  |
|--------------------------------|-----|------|-----|--|--|
| 23                             | 102 | 179  | Neg |  |  |
| 24                             | 133 | 130  | Neg |  |  |
| 25                             | 117 | 256  | Neg |  |  |
| 26                             | 109 | 181  | Neg |  |  |
| 27                             | 121 | 264  | Neg |  |  |
| 28                             | 151 | 197  | Neg |  |  |
| 29                             | 121 | 230  | Neg |  |  |
| 30                             | 113 | 137  | Neg |  |  |
| 31                             | 130 | 207  | Neg |  |  |
| Australian 14-00212-1 Jan 2014 | 128 | 205  | Neg |  |  |
| 2                              | 121 | 256  | Neg |  |  |
| 3                              | 155 | 210  | Neg |  |  |
| 4                              | 172 | 170  | Neg |  |  |
| 5                              | 122 | 205  | Neg |  |  |
| 6                              | 132 | 271  | Neg |  |  |
| 7                              | 139 | 348  | Neg |  |  |
| 8                              | 142 | 203  | Neg |  |  |
| 9                              | 129 | 174  | Neg |  |  |
| 10                             | 117 | 282  | Neg |  |  |
| 11                             | 146 | 168  | Neg |  |  |
| 12                             | 116 | 256  | Neg |  |  |
| 13                             | 107 | 185  | Neg |  |  |
| 14                             | 127 | 390  | Neg |  |  |
| 15                             | 125 | 282  | Neg |  |  |
| 16                             | 101 | 181  | Neg |  |  |
| 17                             | 95  | 257  | Neg |  |  |
| 18                             | 131 | 209  | Neg |  |  |
| 19                             | 83  | 168  | Neg |  |  |
| 20                             | 94  | 181  | Neg |  |  |
| 21                             | 120 | 478  | Neg |  |  |
| 22                             | 120 | 192  | Neg |  |  |
| 23                             | 205 | 1377 | Neg |  |  |
| 24                             | 131 | 251  | Neg |  |  |
| 25                             | 125 | 252  | Neg |  |  |
| 26                             | 140 | 142  | Neg |  |  |
| 27                             | 102 | 144  | Neg |  |  |
| 28                             | 126 | 239  | Neg |  |  |
| 29                             | 109 | 244  | Neg |  |  |
| 30                             | 102 | 159  | Neg |  |  |
| 31                             | 136 | 237  | Neg |  |  |
| 32                             | 122 | 120  | Neg |  |  |
| 33                             | 131 | 167  | Neg |  |  |
| 34                             | 135 | 209  | Neg |  |  |
| 35                             | 102 | 234  | Neg |  |  |
| 36                             | 160 | 174  | Neg |  |  |
| 37                             | 103 | 289  | Neg |  |  |

|    |     |     |     |  |  |
|----|-----|-----|-----|--|--|
| 38 | 106 | 321 | Neg |  |  |
| 39 | 96  | 224 | Neg |  |  |
| 40 | 121 | 268 | Neg |  |  |
| 41 | 113 | 227 | Neg |  |  |
| 42 | 96  | 188 | Neg |  |  |
| 43 | 105 | 240 | Neg |  |  |
| 44 | 96  | 179 | Neg |  |  |
| 45 | 130 | 262 | Neg |  |  |
| 46 | 116 | 242 | Neg |  |  |
| 47 | 123 | 209 | Neg |  |  |
| 48 | 200 | 404 | Neg |  |  |
| 49 | 80  | 240 | Neg |  |  |
| 50 | 132 | 184 | Neg |  |  |
| 51 | 92  | 283 | Neg |  |  |
| 52 | 110 | 296 | Neg |  |  |
| 53 | 114 | 166 | Neg |  |  |
| 54 | 117 | 209 | Neg |  |  |
| 55 | 164 | 175 | Neg |  |  |
| 56 | 128 | 170 | Neg |  |  |
| 57 | 118 | 223 | Neg |  |  |
| 58 | 117 | 200 | Neg |  |  |
| 59 | 148 | 196 | Neg |  |  |
| 60 | 94  | 197 | Neg |  |  |
| 61 | 118 | 342 | Neg |  |  |
| 62 | 144 | 210 | Neg |  |  |
| 63 | 90  | 316 | Neg |  |  |
| 64 | 97  | 152 | Neg |  |  |
| 65 | 121 | 305 | Neg |  |  |
| 66 | 109 | 191 | Neg |  |  |
| 67 | 123 | 175 | Neg |  |  |
| 68 | 86  | 218 | Neg |  |  |
| 69 | 141 | 179 | Neg |  |  |
| 70 | 91  | 155 | Neg |  |  |
| 71 | 106 | 714 | Neg |  |  |
| 72 | 204 | 196 | Neg |  |  |
| 73 | 132 | 199 | Neg |  |  |
| 74 | 275 | 307 | Neg |  |  |
| 75 | 101 | 203 | Neg |  |  |
| 76 | 119 | 285 | Neg |  |  |
| 77 | 147 | 266 | Neg |  |  |
| 78 | 115 | 143 | Neg |  |  |
| 79 | 148 | 193 | Neg |  |  |
| 80 | 145 | 328 | Neg |  |  |
| 81 | 211 | 738 | Neg |  |  |
| 82 | 177 | 359 | Neg |  |  |
| 83 | 183 | 427 | Neg |  |  |

|                                     |     |     |     |  |  |
|-------------------------------------|-----|-----|-----|--|--|
| 84                                  | 153 | 524 | Neg |  |  |
| 85                                  | 144 | 463 | Neg |  |  |
| 86                                  | 142 | 708 | Neg |  |  |
| 87                                  | 141 | 338 | Neg |  |  |
| 88                                  | 156 | 389 | Neg |  |  |
| 89                                  | 161 | 424 | Neg |  |  |
| 90                                  | 121 | 393 | Neg |  |  |
| 91                                  | 251 | 631 | Neg |  |  |
| 92                                  | 185 | 512 | Neg |  |  |
| 93                                  | 103 | 471 | Neg |  |  |
| 94                                  | 199 | 384 | Neg |  |  |
| 95                                  | 153 | 287 | Neg |  |  |
| 96                                  | 142 | 358 | Neg |  |  |
| 97                                  | 130 | 518 | Neg |  |  |
| 98                                  | 115 | 295 | Neg |  |  |
| 99                                  | 164 | 432 | Neg |  |  |
| 100                                 | 140 | 236 | Neg |  |  |
| Australian 14-01185-1 April<br>2014 | 104 | 458 | Neg |  |  |
| 2                                   | 165 | 353 | Neg |  |  |
| 3                                   | 124 | 389 | Neg |  |  |
| 4                                   | 106 | 209 | Neg |  |  |
| 5                                   | 95  | 189 | Neg |  |  |
| 6                                   | 165 | 186 | Neg |  |  |
| 7                                   | 147 | 318 | Neg |  |  |
| 8                                   | 129 | 178 | Neg |  |  |
| 9                                   | 106 | 245 | Neg |  |  |
| 10                                  | 140 | 531 | Neg |  |  |
| 11                                  | 157 | 757 | Neg |  |  |
| 12                                  | 114 | 188 | Neg |  |  |
| 13                                  | 109 | 278 | Neg |  |  |
| 14                                  | 203 | 321 | Neg |  |  |
| 15                                  | 119 | 236 | Neg |  |  |
| 16                                  | 98  | 162 | Neg |  |  |
| 17                                  | 160 | 788 | Neg |  |  |
| 18                                  | 129 | 390 | Neg |  |  |
| 19                                  | 147 | 218 | Neg |  |  |
| 20                                  | 154 | 534 | Neg |  |  |
| 21                                  | 160 | 309 | Neg |  |  |
| 22                                  | 138 | 244 | Neg |  |  |
| 23                                  | 121 | 266 | Neg |  |  |
| 24                                  | 147 | 331 | Neg |  |  |
| 25                                  | 142 | 235 | Neg |  |  |
| 26                                  | 112 | 289 | Neg |  |  |
| 27                                  | 89  | 191 | Neg |  |  |
| 28                                  | 190 | 402 | Neg |  |  |

|    |     |     |     |  |  |
|----|-----|-----|-----|--|--|
| 29 | 182 | 301 | Neg |  |  |
| 30 | 140 | 396 | Neg |  |  |
| 31 | 127 | 355 | Neg |  |  |
| 32 | 162 | 562 | Neg |  |  |
| 33 | 97  | 488 | Neg |  |  |
| 34 | 115 | 262 | Neg |  |  |
| 35 | 115 | 458 | Neg |  |  |
| 36 | 104 | 239 | Neg |  |  |
| 37 | 138 | 309 | Neg |  |  |
| 38 | 130 | 291 | Neg |  |  |
| 39 | 109 | 266 | Neg |  |  |
| 40 | 108 | 271 | Neg |  |  |
| 41 | 78  | 278 | Neg |  |  |
| 42 | 121 | 297 | Neg |  |  |
| 43 | 183 | 256 | Neg |  |  |
| 44 | 191 | 278 | Neg |  |  |
| 45 | 121 | 196 | Neg |  |  |
| 46 | 140 | 168 | Neg |  |  |
| 47 | 139 | 192 | Neg |  |  |
| 48 | 83  | 495 | Neg |  |  |
| 49 | 139 | 283 | Neg |  |  |
| 50 | 116 | 255 | Neg |  |  |
| 51 | 95  | 300 | Neg |  |  |
| 52 | 89  | 260 | Neg |  |  |
| 53 | 105 | 215 | Neg |  |  |
| 54 | 158 | 324 | Neg |  |  |
| 55 | 141 | 236 | Neg |  |  |
| 56 | 110 | 356 | Neg |  |  |
| 57 | 76  | 245 | Neg |  |  |
| 58 | 130 | 287 | Neg |  |  |
| 59 | 80  | 298 | Neg |  |  |
| 60 | 150 | 329 | Neg |  |  |
| 61 | 91  | 151 | Neg |  |  |
| 62 | 90  | 288 | Neg |  |  |
| 63 | 118 | 246 | Neg |  |  |
| 64 | 97  | 321 | Neg |  |  |
| 65 | 86  | 276 | Neg |  |  |
| 66 | 136 | 517 | Neg |  |  |
| 67 | 80  | 292 | Neg |  |  |
| 68 | 172 | 529 | Neg |  |  |
| 69 | 87  | 191 | Neg |  |  |
| 70 | 129 | 225 | Neg |  |  |
| 71 | 122 | 279 | Neg |  |  |
| 72 | 74  | 229 | Neg |  |  |
| 73 | 65  | 351 | Neg |  |  |
| 74 | 102 | 282 | Neg |  |  |

|                                |     |     |     |   |     |
|--------------------------------|-----|-----|-----|---|-----|
| 75                             | 138 | 316 | Neg |   |     |
| 76                             | 153 | 562 | Neg |   |     |
| 77                             | 162 | 252 | Neg |   |     |
| 78                             | 90  | 161 | Neg |   |     |
| 79                             | 82  | 320 | Neg |   |     |
| 80                             | 101 | 252 | Neg |   |     |
| 81                             | 59  | 339 | Neg |   |     |
| 82                             | 87  | 253 | Neg |   |     |
| 83                             | 137 | 263 | Neg |   |     |
| 84                             | 83  | 284 | Neg |   |     |
| 85                             | 100 | 194 | Neg |   |     |
| 86                             | 93  | 176 | Neg |   |     |
| 87                             | 86  | 372 | Neg |   |     |
| 88                             | 91  | 343 | Neg |   |     |
| 89                             | 125 | 476 | Neg |   |     |
| 90                             | 111 | 206 | Neg |   |     |
| 91                             | 111 | 285 | Neg |   |     |
| 92                             | 142 | 712 | Neg |   |     |
| 93                             | 100 | 223 | Neg |   |     |
| 94                             | 96  | 276 | Neg |   |     |
| 95                             | 85  | 349 | Neg |   |     |
| 96                             | 119 | 559 | Neg |   |     |
| 97                             | 138 | 278 | Neg |   |     |
| 98                             | 106 | 432 | Neg |   |     |
| 99                             | 91  | 371 | Neg |   |     |
| 100                            | 132 | 390 | Neg |   |     |
| Australian 14-02799-1 Aug 2014 | 433 | 722 | Neg | M | 8   |
| 2                              | 137 | 172 | Neg | M | 8   |
| 3                              | 188 | 204 | Neg | M | 8   |
| 4                              | 161 | 202 | Neg | M | 2   |
| 5                              | 166 | 209 | Neg | M | 2   |
| 6                              | 167 | 222 | Neg | F | 1.5 |
| 7                              | 182 | 311 | Neg | M | 7   |
| 8                              | 329 | 369 | Neg | F | 7   |
| 9                              | 140 | 168 | Neg | F | 5   |
| 10                             | 185 | 261 | Neg | F | 7   |
| 11                             | 231 | 252 | Neg | M | 5   |
| 12                             | 192 | 332 | Neg | F | 2   |
| 13                             | 233 | 353 | Neg | F | 5   |
| 14                             | 268 | 307 | Neg | F | 5   |
| 15                             | 273 | 520 | Neg | F | 3   |
| 16                             | 251 | 501 | Neg | F | 5   |
| 17                             | 151 | 213 | Neg | M | 3   |
| 18                             | 246 | 377 | Neg | F | 4   |
| 19                             | 363 | 881 | Neg | F | 2   |
| 20                             | 233 | 439 | Neg | M | 3   |

|    |     |     |     |   |     |
|----|-----|-----|-----|---|-----|
| 21 | 252 | 308 | Neg | F | 1.5 |
| 22 | 269 | 233 | Neg | F | 8   |
| 23 | 245 | 285 | Neg | M | 6   |
| 24 | 144 | 127 | Neg | M | 7   |
| 25 | 238 | 347 | Neg | F | 3   |
| 26 | 190 | 352 | Neg | M | 2   |
| 27 | 164 | 262 | Neg | M | 3   |
| 28 | 313 | 406 | Neg | F | 2   |
| 29 | 203 | 281 | Neg | M | 2   |
| 30 | 325 | 464 | Neg | F | 3   |
| 31 | 151 | 236 | Neg | M | 15  |
| 32 | 173 | 257 | Neg | M | 20  |
| 33 | 231 | 203 | Neg | M | 10  |
| 34 | 173 | 365 | Neg | M | 10  |
| 35 | 187 | 243 | Neg | M | 20  |
| 36 | 263 | 194 | Neg | M | 10  |
| 37 | 268 | 455 | Neg | M | 15  |
| 38 | 213 | 330 | Neg | F | 10  |
| 39 | 151 | 206 | Neg | M | 20  |
| 40 | 126 | 273 | Neg | F | 7   |
| 41 | 192 | 174 | Neg | F | 8   |
| 42 | 189 | 194 | Neg | F | 7   |
| 43 | 242 | 336 | Neg | F | 3   |
| 44 | 177 | 234 | Neg | F | 2   |
| 45 | 224 | 257 | Neg | F | 10  |
| 46 | 276 | 300 | Neg | F | 15  |
| 47 | 251 | 268 | Neg | F | 10  |
| 48 | 180 | 170 | Neg | F | 12  |
| 49 | 140 | 213 | Neg | F | 10  |
| 50 | 127 | 233 | Neg | F | 15  |
| 51 | 138 | 343 | Neg | M | 2   |
| 52 | 346 | 481 | Neg | M | 2   |
| 53 | 226 | 334 | Neg | F | 4   |
| 54 | 519 | 360 | Neg | F | 4   |
| 55 | 946 | 658 | Neg | F | 5   |
| 56 | 251 | 349 | Neg | F | 3   |
| 57 | 198 | 297 | Neg | F | 2   |
| 58 | 180 | 275 | Neg | F | 2   |
| 59 | 160 | 245 | Neg | F | 2   |
| 60 | 187 | 245 | Neg | F | 2   |
| 61 | 183 | 359 | Neg |   |     |
| 62 | 142 | 207 | Neg |   |     |
| 63 | 145 | 185 | Neg |   |     |
| 64 | 144 | 194 | Neg |   |     |
| 65 | 142 | 176 | Neg |   |     |
| 66 | 166 | 247 | Neg |   |     |

|    |     |     |     |  |  |
|----|-----|-----|-----|--|--|
| 67 | 158 | 294 | Neg |  |  |
| 68 | 170 | 272 | Neg |  |  |
| 69 | 187 | 250 | Neg |  |  |
| 70 | 182 | 247 | Neg |  |  |
| 71 | 200 | 261 | Neg |  |  |
| 72 | 133 | 184 | Neg |  |  |
| 73 | 172 | 257 | Neg |  |  |
| 74 | 191 | 291 | Neg |  |  |
| 75 | 163 | 211 | Neg |  |  |
| 76 | 749 | 276 | Neg |  |  |
